# Supplementary material
Source: PubMed Central journal article supplement (PMC2920724)
Supplement: mmc1.pdf [file mmc1.pdf]

Biophysical Journal, Volume 99

Supporting Material

**Triphasic Force Dependence of E-Selectin/Ligand Dissociation  
Governs Cell Rolling Under Flow**

Annica M. Wayman, Wei Chen, Rodger P. McEver, and Cheng Zhu

**Supporting Material**

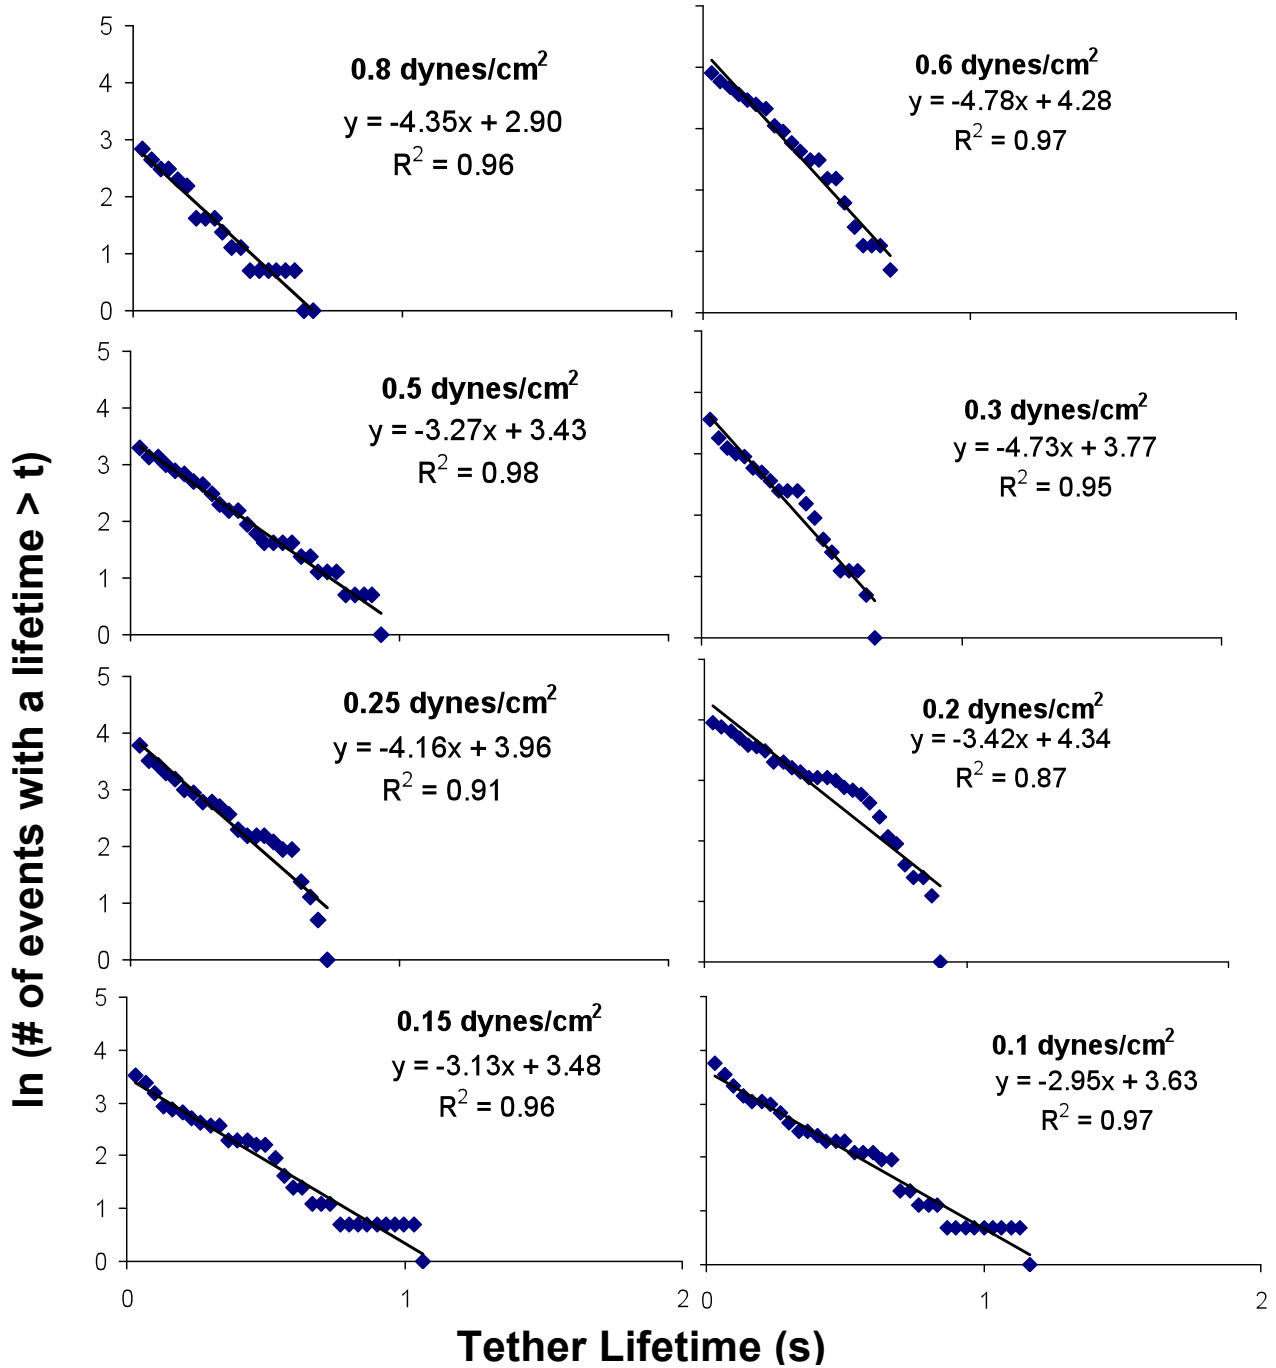

**Figure S1:** Representative dissociation curves for the transient tethering of neutrophils to E-selectin at various shear stresses

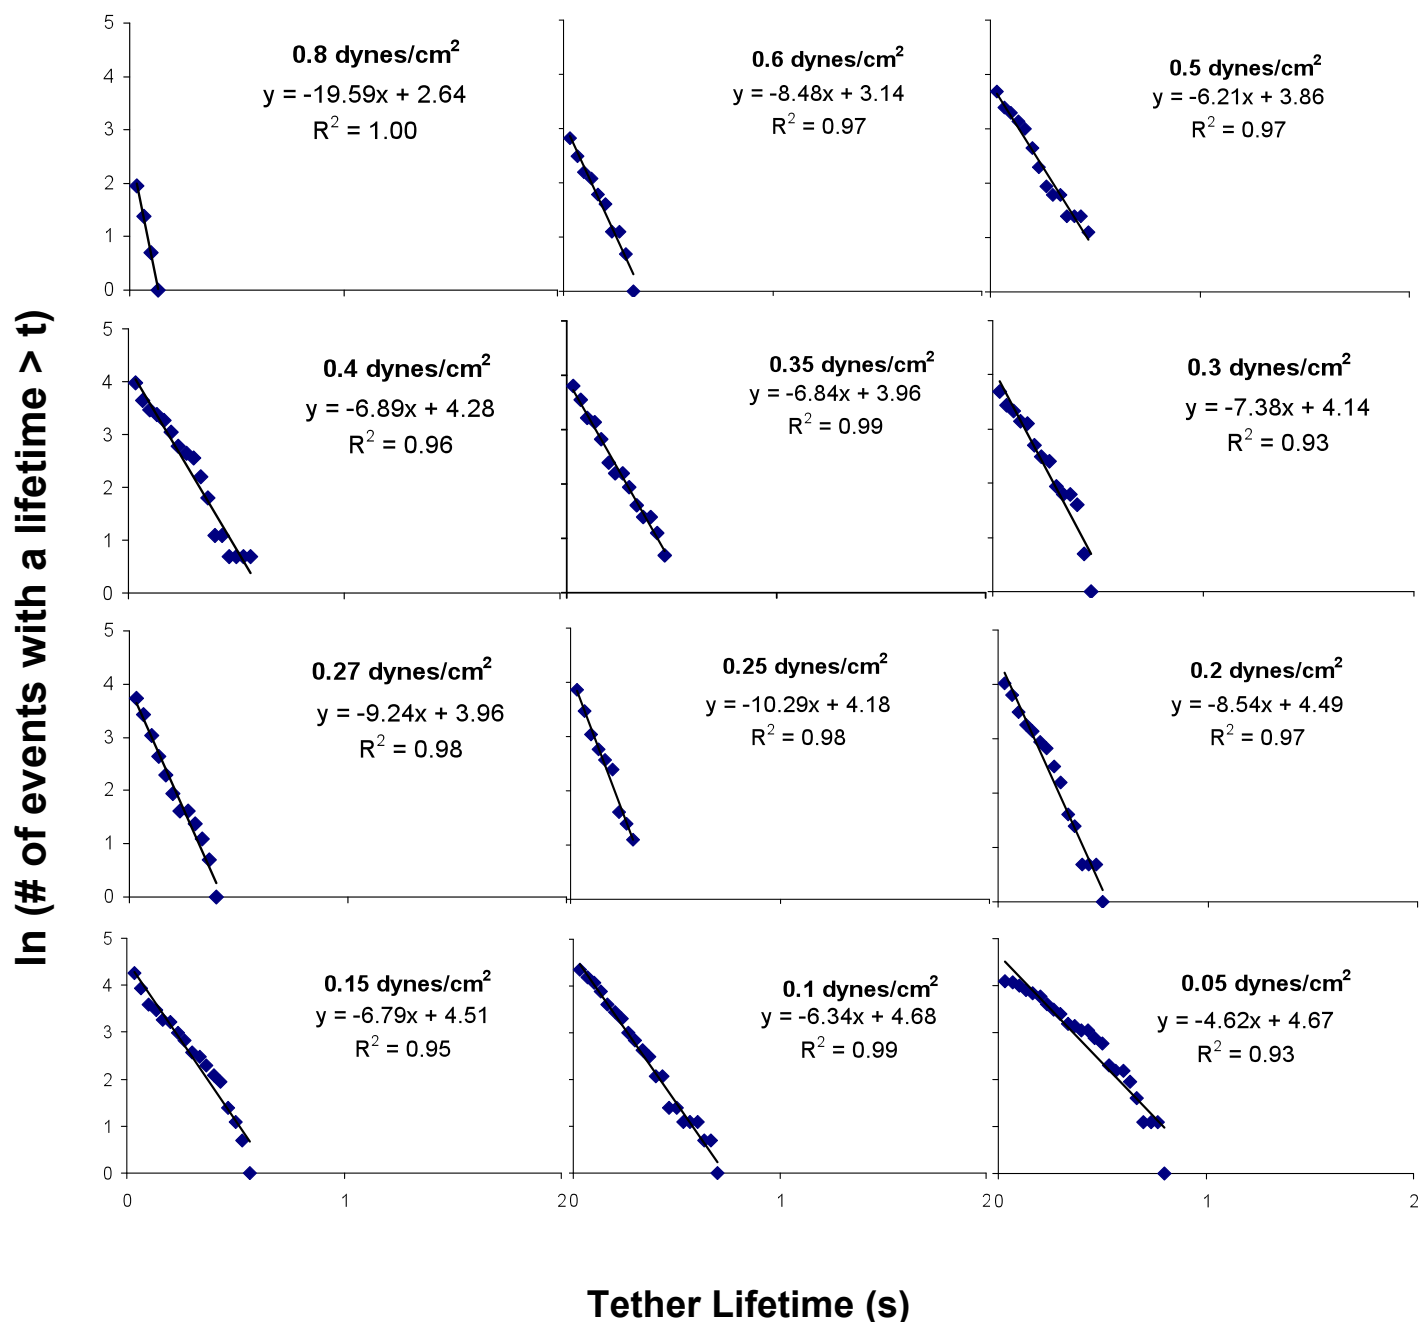

**Figure S2:** Representative dissociation curves for the transient tethering of sLe<sup>x</sup>-coated beads to E-selectin at various shear stresses

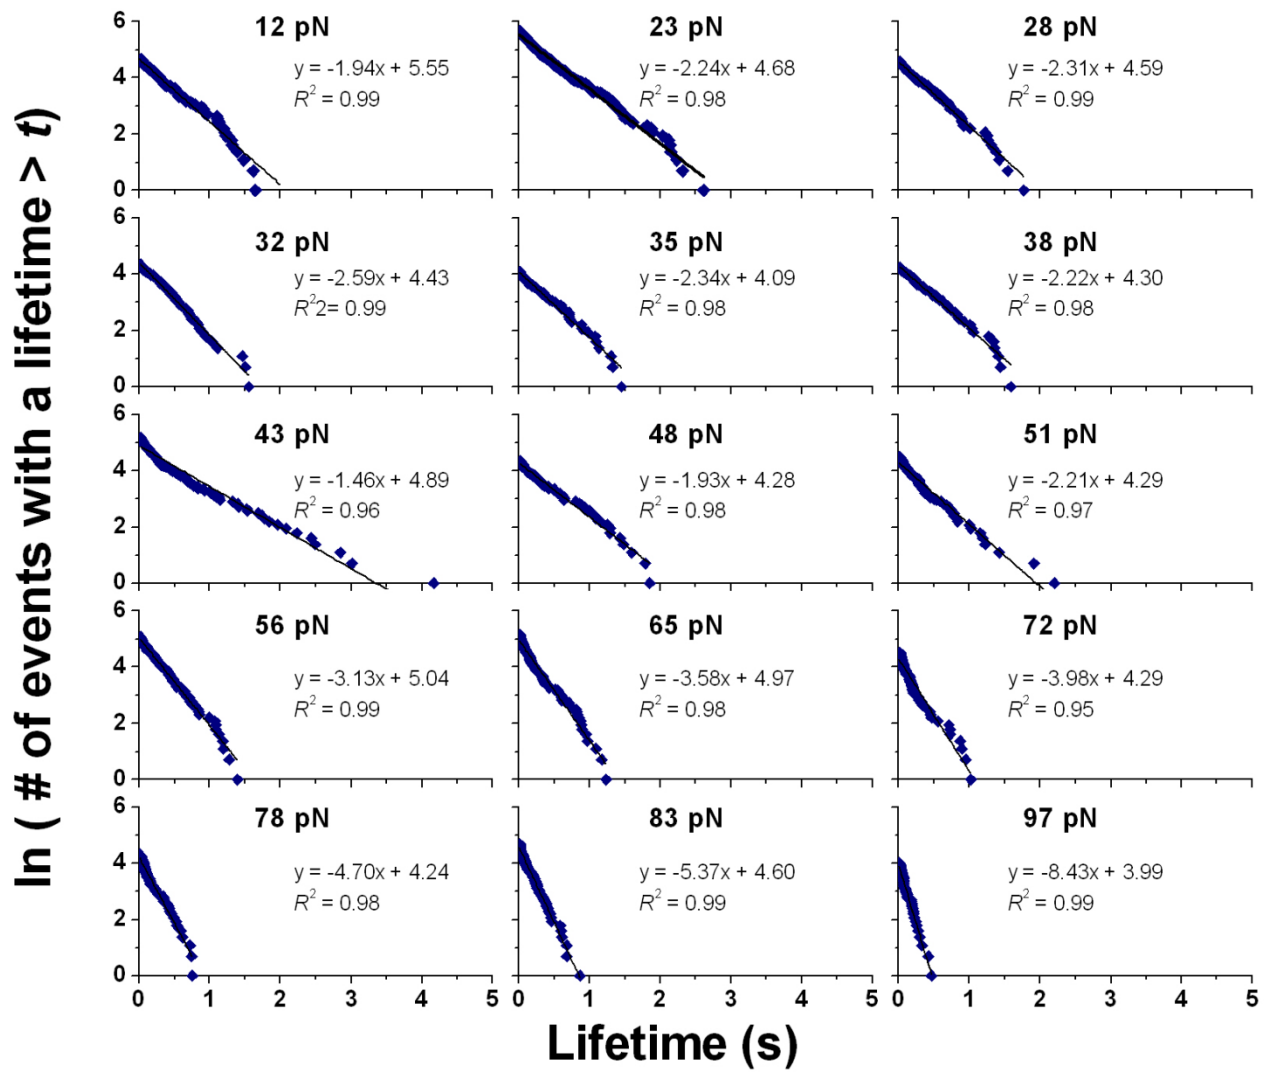

**Figure S3:** Representative dissociation curves for the E-selectin/sLe<sup>x</sup> interaction at various forces using BFP
